# Supplementary material for: Wide genetic variation in phenolic compound content of seed coats among black soybean cultivars
Source: PubMed Central journal article supplement — Breed Sci. 2014 Dec 1;64(4):409–15. doi: 10.1270/jsbbs.64.409 (PMC4267317; doi:10.1270/jsbbs.64.409), 2014-12-01
Supplement: 64_409-s1.pdf [file 64_409-s1.pdf]

Supplemental Table 1. Cultivars used in this research

| JP number | variety name                 | Status        | Origin      | Sources | Cluster No.* |
|-----------|------------------------------|---------------|-------------|---------|--------------|
|           | Kingwa                       | Breeders line | USA         | USDA    |              |
|           | Laredo                       | Breeders line | USA         | USDA    |              |
|           | PI175184                     | Landrace      | India       | USDA    |              |
|           | KAERI 610-3                  | Landrace      | Korea       | USDA    |              |
|           | Peking                       | Landrace      | China       | USDA    |              |
|           | PI602991                     | Landrace      | China       | USDA    |              |
|           | TAMADAIKOKU                  | Breeders line | Nagano      | NAGANO  |              |
|           | SHINANOWASEGURO              | Breeders line | Nagano      | NAGANO  |              |
|           | SHINANOGURO                  | Landrace      | Nagano      | NAGANO  |              |
| 29359     | TAMBAGURO                    | Landrace      | Hyogo       | NIAS    | J5F          |
| 29246     | ZAIRAI 51-11                 | Landrace      | Aichi       | NIAS    |              |
| 29253     | ZAIRAI 51-2                  | Landrace      | Aichi       | NIAS    | J5E          |
| 35378     | ZAIRAISHU M 1                | Landrace      | Aichi       | NIAS    |              |
| 29414     | COL/EHIME/1983/UTSUNOMIYA 29 | Landrace      | Ehime       | NIAS    |              |
| 28582     | SHIMIZU 1-8-1                | Landrace      | Ibaragi     | NIAS    |              |
| 29102     | KURO DAIZU(ISHIOKA 45)       | Landrace      | Ibaragi     | NIAS    |              |
| 29104     | KURO DAIZU                   | Landrace      | Ibaragi     | NIAS    |              |
| 76508     | KUROMAME                     | Landrace      | Ibaragi     | NIAS    | J5F          |
| 29451     | KURO DAIZU(OKAYAMA)          | Landrace      | Okayama     | NIAS    |              |
| 29452     | GANKUI MAME                  | Landrace      | Okayama     | NIAS    | J5E          |
| 49013     | KUROSENGOKU KINAI 5          | Landrace      | Okinawa     | NIAS    |              |
| 28931     | KURO DAIZU                   | Landrace      | Kanto-tozan | NIAS    |              |
| 27863     | KUROHIRA                     | Landrace      | Iwate       | NIAS    | J5E          |
| 28460     | SANDAN MAME                  | Landrace      | Iwate       | NIAS    | J3B          |
| 76510     | KUROMAME                     | Landrace      | Iwate       | NIAS    | J5E          |
| 76545     | KUROMAME                     | Landrace      | Iwate       | NIAS    | J5E          |
| 85364     | KUROMAME                     | Landrace      | Iwate       | NIAS    | J5D          |
| 85529     | KUROMAME                     | Landrace      | Iwate       | NIAS    | J5D          |
| 85537     | KUROMAME                     | Landrace      | Iwate       | NIAS    | J5D          |
| 29225     | COL/GIFU/1984/OGURI 6        | Landrace      | Gifu        | NIAS    | J5C          |
| 85551     | KUROMAME                     | Landrace      | Miyagi      | NIAS    | J5E          |
| 85554     | KUROMAME                     | Landrace      | Miyagi      | NIAS    | J5E          |
| 85555     | KUROMAME                     | Landrace      | Miyagi      | NIAS    |              |
| 87834     | KUROMAME                     | Landrace      | Miyagi      | NIAS    | J5F          |
| 49593     | TANBAKURO/OOGATA/1988        | Landrace      | Kyoto       | NIAS    | J5F          |
| 29493     | KOMUTA                       | Landrace      | Kumamoto    | NIAS    | E4A          |
| 29535     | KURO DAIZU                   | Landrace      | Kumamoto    | NIAS    | J5C          |
| 29620     | ZAIRAI KURO DAIZU            | Landrace      | Kumamoto    | NIAS    |              |
| 29697     | MIKAWA ZAIRAI 83             | Landrace      | Kumamoto    | NIAS    |              |
| 29698     | KAOU ZAIRAI 83A              | Landrace      | Kumamoto    | NIAS    |              |
| 29699     | KAOU ZAIRAI 83B              | Landrace      | Kumamoto    | NIAS    |              |
| 29700     | KAOU ZAIRAI 83C              | Landrace      | Kumamoto    | NIAS    |              |
| 29705     | IZUMI ZAIRAI 83E             | Landrace      | Kumamoto    | NIAS    |              |
| 29709     | TOUYOU ZAIRAI 83B            | Landrace      | Kumamoto    | NIAS    |              |
| 29711     | ITSUKI ZAIRAI 83A            | Landrace      | Kumamoto    | NIAS    | J5F          |
| 29719     | ITSUKI ZAIRAI 83L            | Landrace      | Kumamoto    | NIAS    |              |
| 29720     | SHICHIJOU ZAIRAI 83A         | Landrace      | Kumamoto    | NIAS    | J5F          |
| 29721     | SHICHIJOU ZAIRAI 83C         | Landrace      | Kumamoto    | NIAS    |              |
| 29722     | SHICHIJOU ZAIRAI 83D         | Landrace      | Kumamoto    | NIAS    |              |
| 29696     | NANKAN ZAIRAI 83             | Landrace      | Kumamoto    | NIAS    | J7           |
| 28482     | KURO                         | Landrace      | Gunma       | NIAS    |              |
| 73035     | KURODAIZU                    | Landrace      | Gunma       | NIAS    | J5E          |
| 73036     | KUROMAME                     | Landrace      | Gunma       | NIAS    | J5E          |
| 73068     | KUROMAME                     | Landrace      | Gunma       | NIAS    | J5F          |
| 28952     | HIROSHIMA KURO DAIZU         | Landrace      | Hiroshima   | NIAS    | J5F          |
| 29459     | HIROSHIMA KURO DAIZU         | Landrace      | Hiroshima   | NIAS    |              |
| 81620     | KURODAIZU                    | Landrace      | Kochi       | NIAS    | J5F          |
| 81623     | DAIZU                        | Landrace      | Kochi       | NIAS    | J5F          |
| 73149     | KUROMAME                     | Landrace      | Saitama     | NIAS    | J5F          |
| 28360     | BANSEI KURO DAIZU            | Landrace      | Mie         | NIAS    |              |
| 90897     | KURODAIZU                    | Landrace      | Mie         | NIAS    | J5F          |
| 90899     | KUROMAME                     | Landrace      | Mie         | NIAS    | J5F          |

Supplemental Table 1. Cultivars used in this research

| JP number | variety name                 | Status        | Origin    | Sources | Cluster No.* |
|-----------|------------------------------|---------------|-----------|---------|--------------|
| 27940     | KURO TAIRYUU DAIZU           | Landrace      | Yamagata  | NIAS    |              |
| 27941     | KURO MAME(YAMAGATA)          | Landrace      | Yamagata  | NIAS    |              |
| 27980     | KUROZATOU MAME               | Landrace      | Yamagata  | NIAS    | J3B          |
| 76513     | ITSUTSUPPAMAME               | Landrace      | Yamagata  | NIAS    | J5D          |
| 76515     | KUROMAME                     | Landrace      | Yamagata  | NIAS    | J5D          |
| 76517     | KUROMAME                     | Landrace      | Yamagata  | NIAS    |              |
| 76543     | BITTARAMAME                  | Landrace      | Yamagata  | NIAS    | J5E          |
| 76548     | KUROMAME                     | Landrace      | Yamagata  | NIAS    | J5E          |
| 76549     | KUROGOYOU                    | Landrace      | Yamagata  | NIAS    |              |
| 76550     | KUROMAME                     | Landrace      | Yamagata  | NIAS    |              |
| 76554     | KUROGOYOU                    | Landrace      | Yamagata  | NIAS    | J5D          |
| 76555     | ITSUTSUBA                    | Landrace      | Yamagata  | NIAS    | J5D          |
| 76557     | KUROMAME                     | Landrace      | Yamagata  | NIAS    |              |
| 76559     | KURODAIZU                    | Landrace      | Yamagata  | NIAS    | J5D          |
| 87826     | KUROMAME                     | Landrace      | Yamagata  | NIAS    | J5E          |
| 87830     | KUROMAME                     | Landrace      | Yamagata  | NIAS    |              |
| 87837     | KUROMAME                     | Landrace      | Yamagata  | NIAS    | J5E          |
| 29454     | HIROSE KURO DAIZU            | Landrace      | Yamaguchi | NIAS    | J5C          |
| 28867     | MAEDAMURA ZAIRAI             | Landrace      | Yamanashi | NIAS    | J5F          |
| 85523     | KURODAIZU                    | Landrace      | Kagoshima | NIAS    | J5F          |
| 85525     | KUROMAME                     | Landrace      | Kagoshima | NIAS    | J5F          |
| 27846     | KURO MAME                    | Landrace      | Akita     | NIAS    | J2           |
| 28229     | KURO SAKIGAKE                | Landrace      | Niigata   | NIAS    | J5E          |
| 28306     | WASE KURO MAME               | Landrace      | Niigata   | NIAS    |              |
| 73049     | KUROMAME                     | Landrace      | Niigata   | NIAS    |              |
| 73051     | TSUYANASHIKUROMAME           | Landrace      | Niigata   | NIAS    |              |
| 73055     | KUROMAME                     | Landrace      | Niigata   | NIAS    | J5A          |
| 73164     | KUROMAME                     | Landrace      | Niigata   | NIAS    |              |
| 73169     | KUROMAME                     | Landrace      | Niigata   | NIAS    |              |
| 27742     | GOISHI SHIROHANA             | Landrace      | Aomori    | NIAS    | J5E          |
| 28199     | COL/AOMORI/1983-31           | Landrace      | Aomori    | NIAS    |              |
| 28206     | HIKARIKURO                   | Landrace      | Aomori    | NIAS    |              |
| 35264     | KURO MAME L 117              | Landrace      | Aomori    | NIAS    |              |
| 35267     | KURO MAME L 120              | Landrace      | Aomori    | NIAS    |              |
| 35276     | COL/AOMORI/1981/L 133        | Landrace      | Aomori    | NIAS    |              |
| 40256     | KURO MAME L99                | Landrace      | Aomori    | NIAS    |              |
| 81626     | COL/AOMORI/1994/MAFF/006     | Landrace      | Aomori    | NIAS    |              |
| 81627     | KUROMAME                     | Landrace      | Aomori    | NIAS    | J5E          |
| 81629     | KUROMAME                     | Landrace      | Aomori    | NIAS    |              |
| 28080     | KURO DAIZU                   | Landrace      | Aomori    | NIAS    |              |
| 35337     | ZAI 52-11                    | Landrace      | Chiba     | NIAS    |              |
| 35348     | ZAI 54-12                    | Landrace      | Chiba     | NIAS    |              |
| 35352     | ZAI 54-21                    | Landrace      | Chiba     | NIAS    |              |
| 67989     | TSURUSENGOKU                 | Breeders line | Chiba     | NIAS    |              |
| 68015     | TSURUMAME CHIBA 4N           | Breeders line | Chiba     | NIAS    |              |
| 28539     | YASEI DAIZU                  | Wild          | Osaka     | NIAS    |              |
| 76320     | MAETUE ZAIRAI 90A            | Landrace      | Oita      | NIAS    |              |
| 76322     | MAETUE ZAIRAI 90C            | Landrace      | Oita      | NIAS    | J5F          |
| 76327     | KOISHIBARA ZAIRAI 90G        | Landrace      | Oita      | NIAS    | J5F          |
| 29034     | CHOUHIN HITASHI 1            | Landrace      | Nagano    | NIAS    |              |
| 29035     | CHOUHIN HITASHI 2            | Landrace      | Nagano    | NIAS    | J5E          |
| 29036     | CHOUHIN HITASHI 3            | Landrace      | Nagano    | NIAS    |              |
| 29038     | CHOUHIN HITASHI 5            | Landrace      | Nagano    | NIAS    | J5E          |
| 29052     | OGAWA ZAIRAI(2)              | Landrace      | Nagano    | NIAS    |              |
| 29054     | OOSHIKA ZAIRAI               | Landrace      | Nagano    | NIAS    |              |
| 29103     | KURO MAME(NAGANO)            | Landrace      | Nagano    | NIAS    |              |
| 29105     | KURO HITASHIMAME             | Landrace      | Nagano    | NIAS    | J5E          |
| 29190     | SHINANO KURO                 | Landrace      | Nagano    | NIAS    |              |
| 35330     | COL/NAGANO/1983/HORIUCHI 5-1 | Landrace      | Nagano    | NIAS    |              |
| 49764     | SHINANOKURO                  | Landrace      | Nagano    | NIAS    |              |
| 67654     | KUROMAME(NAGANO)             | Landrace      | Nagano    | NIAS    |              |
| 67655     | KUROMAME(SHIOJIRI)           | Landrace      | Nagano    | NIAS    |              |

Supplemental Table 1. Cultivars used in this research

| JP number | variety name                | Status        | Origin          | Sources | Cluster No.* |
|-----------|-----------------------------|---------------|-----------------|---------|--------------|
| 67656     | KUROMAME(OGAWAMURA)         | Landrace      | Nagano          | NIAS    |              |
| 67657     | KUROMAME(MISATO)            | Landrace      | Nagano          | NIAS    |              |
| 70214     | MINAMI SHINANO ZAIRAI 2     | Landrace      | Nagano          | NIAS    |              |
| 70225     | KAMIMURA SHINOGURI ZAIRAI 3 | Landrace      | Nagano          | NIAS    |              |
| 70229     | OOSHIKA ZAIRAI 1(SOU)       | Landrace      | Nagano          | NIAS    |              |
| 70230     | OOSHIKA ZAIRAI 1(BAN)       | Landrace      | Nagano          | NIAS    |              |
| 70236     | KUROMAME(KAKIZAWA)          | Landrace      | Nagano          | NIAS    |              |
| 73170     | COL/NAGANO/1988/MAFF/195    | Landrace      | Nagano          | NIAS    |              |
| 73171     | COL/NAGANO/1988/MAFF/196    | Landrace      | Nagano          | NIAS    |              |
| 73174     | KUROMAME                    | Landrace      | Nagano          | NIAS    | J5C          |
| 73221     | KUROMAME                    | Landrace      | Nagano          | NIAS    | J5H          |
| 73230     | KUROMAME                    | Landrace      | Nagano          | NIAS    | J5H          |
| 88531     | KUROMAME (SHIROHANA)        | Landrace      | Nagano          | NIAS    |              |
| 88532     | KUROMAME (MURASAKIHANA)     | Landrace      | Nagano          | NIAS    |              |
| 87845     | KURODAIZU                   | Landrace      | Shimane         | NIAS    | J5F          |
| 87847     | KUROMAME                    | Landrace      | Shimane         | NIAS    | J5F          |
| 27871     | GANKUI 1                    | Landrace      | Tohoku(Unknown) | NIAS    |              |
| 27872     | GANKUI 3                    | Landrace      | Tohoku(Unknown) | NIAS    |              |
| 28145     | SHICHIGATSU MAME            | Landrace      | Tohoku(Unknown) | NIAS    |              |
| 29119     | KURO DAIZU 1(TOCHIGI)       | Landrace      | Tochigi         | NIAS    |              |
| 29120     | KURO DAIZU 2(TOCHIGI)       | Landrace      | Tochigi         | NIAS    | J5E          |
| 67660     | UJIE ZAIRAI(SHIRO HANA)     | Landrace      | Tochigi         | NIAS    | J5E          |
| 67661     | UJIE ZAIRAI(MURASAKI HANA)  | Landrace      | Tochigi         | NIAS    |              |
| 68014     | OOBATSURUMAME NAKEI 50      | Breeders line | Tochigi         | NIAS    |              |
| 90903     | KUROMAME                    | Landrace      | Nara            | NIAS    | J5F          |
| 90904     | KUROMAME                    | Landrace      | Nara            | NIAS    |              |
| 90905     | KUROMAME                    | Landrace      | Nara            | NIAS    | J5F          |
| 90911     | DAIZU                       | Landrace      | Nara            | NIAS    | J5F          |
| 90916     | DAIZU                       | Landrace      | Nara            | NIAS    | J5F          |
| 110305    | KURODAIZU                   | Landrace      | Nara            | NIAS    | J5C          |
| 27392     | GOYOU KUROMAME              | Landrace      | Japan(Unknown)  | NIAS    |              |
| 27679     | KURO SHOURYUU               | Landrace      | Japan(Unknown)  | NIAS    |              |
| 27680     | KURO CHUURYUU               | Landrace      | Japan(Unknown)  | NIAS    |              |
| 27681     | MOYASHI MAME                | Landrace      | Japan(Unknown)  | NIAS    |              |
| 28230     | GOISHI MAME(ZAIRAI)         | Landrace      | Japan(Unknown)  | NIAS    | J5E          |
| 28394     | KURO MAME                   | Landrace      | Japan(Unknown)  | NIAS    |              |
| 28698     | CHOGAN TOUJI                | Landrace      | Japan(Unknown)  | NIAS    |              |
| 28731     | TEN AN                      | Landrace      | Japan(Unknown)  | NIAS    |              |
| 29106     | KOMAMAKI ZAIRAI(KURO)       | Landrace      | Japan(Unknown)  | NIAS    |              |
| 29107     | ZAIRAI KURO DAIZU           | Landrace      | Japan(Unknown)  | NIAS    |              |
| 29295     | CHOUSEN KURO DAIZU          | Landrace      | Japan(Unknown)  | NIAS    |              |
| 29296     | KINAI KURO SENGOKU 2        | Landrace      | Japan(Unknown)  | NIAS    |              |
| 29299     | TOCHIGI KURO SENGOKU        | Landrace      | Japan(Unknown)  | NIAS    |              |
| 29328     | KURO MAME(NAGATA)           | Landrace      | Japan(Unknown)  | NIAS    |              |
| 29336     | SANTOU SHIN CHIKUKAN        | Landrace      | Japan(Unknown)  | NIAS    |              |
| 29523     | GINSUI ZAIRAI               | Landrace      | Japan(Unknown)  | NIAS    |              |
| 29612     | MANSHUU KUROSENGOKU         | Landrace      | Japan(Unknown)  | NIAS    |              |
| 29627     | KINAI KURO SENGOKU          | Landrace      | Japan(Unknown)  | NIAS    |              |
| 29628     | MANSHUU KURO SENGOKU        | Landrace      | Japan(Unknown)  | NIAS    |              |
| 29629     | CHOUSEN KURO SENGOKU        | Landrace      | Japan(Unknown)  | NIAS    |              |
| 35135     | KURO                        | Landrace      | Japan(Unknown)  | NIAS    |              |
| 68009     | GURASUDAUN                  | Landrace      | Japan(Unknown)  | NIAS    |              |
| 90782     | TOCHIGI CHA SENGOKU NO.3    | Landrace      | Japan(Unknown)  | NIAS    |              |
| 28257     | ZENKOUJI                    | Landrace      | Fukui           | NIAS    | J5F          |
| 28308     | COL/FUKUI/1983/MAWAKI 1     | Landrace      | Fukui           | NIAS    | J5F          |
| 29602     | KURO SENGOKU                | Landrace      | Fukuoka         | NIAS    |              |
| 76306     | YABE ZAIRAI 90F             | Landrace      | Fukuoka         | NIAS    | J5F          |
| 76311     | AMAGI ZAIRAI 90B            | Landrace      | Fukuoka         | NIAS    | J5F          |
| 76312     | AMAGI ZAIRAI 90C            | Landrace      | Fukuoka         | NIAS    |              |
| 76314     | YABE ZAIRAI 90B             | Landrace      | Fukuoka         | NIAS    | J5F          |
| 76317     | YABE ZAIRAI 90H             | Landrace      | Fukuoka         | NIAS    |              |
| 76318     | YABE ZAIRAI 90I             | Landrace      | Fukuoka         | NIAS    |              |

Supplemental Table 1. Cultivars used in this research

| JP number | variety name             | Status   | Origin            | Sources | Cluster No.* |
|-----------|--------------------------|----------|-------------------|---------|--------------|
| 76319     | YABE ZAIRAI 90K          | Landrace | Fukuoka           | NIAS    |              |
| 28214     | KUROGOYOU                | Landrace | Fukushima         | NIAS    | J5D          |
| 73028     | CHINCHINMAME             | Landrace | Fukushima         | NIAS    | J5E          |
| 73061     | KUROMAME                 | Landrace | Fukushima         | NIAS    | J5E          |
| 73109     | MOCHIMAME                | Landrace | Fukushima         | NIAS    |              |
| 73111     | KUROMAME.BETTARAMAME     | Landrace | Fukushima         | NIAS    | J5E          |
| 73114     | KUROMAME                 | Landrace | Fukushima         | NIAS    |              |
| 73116     | KUROMAME                 | Landrace | Fukushima         | NIAS    | J5E          |
| 73119     | KUROMAME                 | Landrace | Fukushima         | NIAS    |              |
| 73127     | KUROMAME                 | Landrace | Fukushima         | NIAS    |              |
| 73129     | KUROMAME                 | Landrace | Fukushima         | NIAS    |              |
| 73132     | KUROMAME                 | Landrace | Fukushima         | NIAS    |              |
| 73134     | KUROMAME. WASEMAME       | Landrace | Fukushima         | NIAS    | J5D          |
| 73139     | KUROMAME                 | Landrace | Fukushima         | NIAS    |              |
| 76565     | GOHAMAME                 | Landrace | Fukushima         | NIAS    |              |
| 76567     | KUROMAME                 | Landrace | Fukushima         | NIAS    |              |
| 76572     | KUROMAME                 | Landrace | Fukushima         | NIAS    |              |
| 76573     | KUROMAME                 | Landrace | Fukushima         | NIAS    |              |
| 76576     | KUROMAME                 | Landrace | Fukushima         | NIAS    |              |
| 76577     | KUROMAME                 | Landrace | Fukushima         | NIAS    | J5E          |
| 76583     | KUROMAME                 | Landrace | Fukushima         | NIAS    | J5D          |
| 76585     | KUROMAME                 | Landrace | Fukushima         | NIAS    |              |
| 90891     | KUROMAME                 | Landrace | Fukushima         | NIAS    |              |
| 90894     | KUROMAME                 | Landrace | Fukushima         | NIAS    |              |
| 49575     | TANBA KURO/YAMAGATA/1987 | Landrace | Hyogo             | NIAS    | J5F          |
| 27384     | KURO                     | Landrace | Hokkaido          | NIAS    |              |
| 27431     | WASE KURO SENGOKU        | Landrace | Hokkaido          | NIAS    | J3B          |
| 27707     | CHUUSEI KURO DAIZU       | Landrace | Hokkaido          | NIAS    |              |
| 27708     | BANSEI HIKARIKURO        | Landrace | Hokkaido          | NIAS    | J5D          |
| 27709     | HIKARIKURO               | Landrace | Hokkaido          | NIAS    |              |
| 28073     | KUROKAWA SEIOU           | Landrace | Hokkaido          | NIAS    |              |
| 28453     | HIYAMA KURO 2            | Landrace | Hokkaido          | NIAS    |              |
| 28454     | WASE KUROIHIKARI         | Landrace | Hokkaido          | NIAS    |              |
| 49462     | KONSEN 27                | Landrace | Hokkaido          | NIAS    | J3E          |
| 53324     | AKANUKANAI               | Landrace | Hokkaido          | NIAS    |              |
| 53354     | NAGAHA KURODAIZU         | Landrace | Hokkaido          | NIAS    |              |
| 53356     | KURO(YAGI 2)             | Landrace | Hokkaido          | NIAS    |              |
| 53399     | KONSEN 40                | Landrace | Hokkaido          | NIAS    |              |
| 28261     | GOYOU KURO MAME          | Landrace | Iokuriku(Unknown) | NIAS    |              |
| 110329    | KURODAIZU                | Landrace | Wakayama          | NIAS    |              |
| 110336    | KUROMAME                 | Landrace | Wakayama          | NIAS    | J5F          |

\*: Kaga *et al.*(2010)
